# Supplementary material
Source: MDPI journal article supplement (https://www.mdpi.com/1424-2818/14/10/826)
Supplement: s1 [file s1]

**Supplementary Table S1.** List of published sequences for molecular analyses.

| Species                                                                                                          | Voucher           | Collection information                                                                                    | cox1      | rbcL     |
|------------------------------------------------------------------------------------------------------------------|-------------------|-----------------------------------------------------------------------------------------------------------|-----------|----------|
| <i>Capreolia implexa</i> Guiry & Womersley                                                                       | CNU056136         | Shelly Beach, Warrnambool, Australia                                                                      | KM204060  | KM204081 |
| <i>Gelidiophycus freshwateri</i> G.H.Boo, J.K.Park & S.M.Boo                                                     | CNU049947         | Daecheon, Boryeong, Korea                                                                                 | JX891571  | JX891603 |
| <i>Gelidiorariphycus loratus</i> Iha, S.M.Guimarães, Freshwater & M.C.Oliveira                                   | IBC0256           | On shallow subtidal rocks, Queimada Grande Island (Snake Island), Itanhaém, São Paulo, Brazil; 19.iv.2010 | KT208020  | KT208109 |
| <i>Gelidium abbottiorum</i> R.E. Norris                                                                          | CNU026103 (G2253) | Rocky Bay, Duran, KwaZulu-Natal, South Africa                                                             | KT920390  | -        |
| <i>Gelidium abbottiorum</i>                                                                                      | SA04-109          | Shelly Beach, KwaZulu-Natal, South Africa                                                                 | -         | EF190254 |
| <i>Gelidium adriaticum</i> C.Perrone, A.Bottalico, G.H.Boo & S.M.Boo                                             | BAGR2591          | Torre a Mare, Bari, Apulia, Italy; 25.ix.2012                                                             | KU958469  | KU958475 |
| <i>Gelidium americanum</i> (W.R.Taylor) Santelices                                                               | SP469081          | Pedra do Sal, Luis Correia, Brazil; 26.vi.2013                                                            | KX574741  | KX555615 |
| <i>Gelidium arborescens</i> N.L.Gardner                                                                          | UC93582           | Carmel Bay, Monterey County, California, USA; 17.v.1897                                                   | NC_031836 | KX423474 |
| <i>Gelidium asperum</i> (C.Agardh) Greville                                                                      | CNU037655         | Nora Creina Bay, Australia                                                                                | JX891567  | -        |
| <i>Gelidium asperum</i>                                                                                          | PtLons2           | Point Lonsdale, Victoria, Australia                                                                       | -         | AY350782 |
| <i>Gelidium attenuatum</i> (Turner) Thuret                                                                       | -                 | Aramar, Asturias, Spain                                                                                   | -         | U00110   |
| <i>Gelidium australe</i> J.Agardh                                                                                | GausPtMac-2       | Port McDonnell, South Australia, Australia                                                                | KT920391  | AY350783 |
| <i>Gelidium bernabei</i> A.J.K.Millar & D.W.Freshwater                                                           | NSW-5             | Gordons Bay, Clovelly, New South Wales, Australia                                                         | KT920392  | AY352419 |
| <i>Gelidium brasiliense</i> Brunelli, Boo & M.T.Fujii                                                            | SP470211          | Castelhanos Beach, Anchieta, Espirito Santo, Brazil; 4.x.2017                                             | MH538513  | MH538512 |
| <i>Gelidium calidum</i> Jamas, Iha & Fujii                                                                       | SP469077          | Jauá Beach, Camaçari, Brazil; 23.v.2013                                                                   | KX574739  | KX555613 |
| <i>Gelidium canariense</i> (Grunow) Seoane Camba ex Haroun, Gil-Rodriguez, Diaz de Castro & Prud'homme van Reine | -                 | Puerto de la Cruz, Tenerife, Canary Islands                                                               | -         | L22460   |

|                                                                                              |           |                                                                                         |           |          |
|----------------------------------------------------------------------------------------------|-----------|-----------------------------------------------------------------------------------------|-----------|----------|
| <i>Gelidium capense</i> (S.G. Gmelin) P.C. Silva                                             | CNU026109 | Clovelly, False Bay, Western Cape Prov., South Africa                                   | HM629858  | HM629818 |
| <i>Gelidium carolinianum</i> C.Perrone,<br>D.W.Freshwater, A.Bottalico, G.H.Boo &<br>S.M.Boo | BAGR12109 | Torre a Mare, Bari, Apulia, Italy; Oct 12, 2011                                         | KU564063  | KU564068 |
| <i>Gelidium chilense</i> (Montagne) Santelices &<br>Montalva                                 | -         | Punta Lengua de Vaca, Tongoy Bay, Coquimbo, Chile                                       | -         | AF305800 |
| <i>Gelidium coreanum</i> K.M.Kim, I.K.Hwang,<br>H.S.Yoon & S.M.Boo                           | CNU000127 | Youngjin, Gangneung, Korea                                                              | JQ340419  | JQ340391 |
| <i>Gelidium corneum</i> (Hudson) J.V.Lamouroux                                               | CNU026111 | Morocco                                                                                 | HM629861  | HM629821 |
| <i>Gelidium coulteri</i> Harvey                                                              | CNU026167 | Agate Beach, California, USA                                                            | HM629862  | HM629822 |
| <i>Gelidium crinale</i> (Hare ex Turner) Gaillon                                             | G6292     | Sidmouth, UK                                                                            | JX096542  | JX096520 |
| <i>Gelidium declerckii</i> Tronchin                                                          | S14       | Nahoon Point, East London, Eastern Cape Prov., South<br>Africa                          | KT920394  | AY350775 |
| <i>Gelidium elegans</i> Kützing                                                              | CNU052319 | Seogechoado, Jindo, Korea                                                               | HM629869  | HM629829 |
| <i>Gelidium eucorneum</i> K.M.Kim, I.K.Hwang,<br>J.K.Park & S.M.Boo                          | CNU054478 | Hakdong, Geoje, Korea                                                                   | HM629854  | HM629815 |
| <i>Gelidium floridanum</i> W.R. Taylor                                                       | SP428877  | Joaquina Beach, Florianopolis, Santa Catarina, Brazil;<br>16.xi.2013                    | MF577006  | MF565762 |
| <i>Gelidium foliaceum</i> (Okamura) E.M.Tronchin                                             | GfolSA3   | Breezy Point, Eastern Cape Prov., South Africa                                          | HQ412456  | -        |
| <i>Gelidium foliaceum</i>                                                                    | OfolBP    | East London, Eastern Cape Prov., South Africa                                           | -         | AF501285 |
| <i>Gelidium gabrielsonii</i> Hughey & G.H.Boo                                                | UC2050580 | Hopkins Marine Station, Pacific Grove, Monterey County,<br>California, USA; Jun 8, 2017 | MG922859  | MG922860 |
| <i>Gelidium galapagense</i> W.R.Taylor                                                       | UC1884224 | Banks Bay, Isla Isabela, Galápagos Islands, Ecuador; Jan 13,<br>1934                    | NC_031837 | KX423476 |
| <i>Gelidium gonzalezii</i> D.Rodríguez, Quiroz-<br>González & Ponce-Márquez                  | PTM 10850 | Las Cuatas, Guerrero, Mexico                                                            | MN346977  | MN346968 |

|                                                                  |           |                                                                      |           |          |
|------------------------------------------------------------------|-----------|----------------------------------------------------------------------|-----------|----------|
| <i>Gelidium guimaraesiae</i> Brunelli, Milstein, Boo & M.T.Fujii | SP428772  | Castelhanos Beach, Anchieta, Espirito Santo, Brazil; 22.vi.2013      | MF577009  | MF565764 |
| <i>Gelidium honghaiwanense</i> G.C.Wang & X.L.Wang               | SW6-1     | Shanwei, honghaiwan, China; iv.2015                                  | KY437752  | KY437737 |
| <i>Gelidium indonesianum</i> K.M.Kim, G.S.Gerung & S.M.Boo       | CNU024717 | Java Island, Indonesia                                               | JF330200  | JF330216 |
| <i>Gelidium isabelae</i> W.R.Taylor                              | UC1884226 | Albemarle, Isla Isabela, Galápagos Islands, Ecuador; Jan 12, 1934    | NC_031838 | KX423477 |
| <i>Gelidium japonicum</i> (Harvey) Okamura                       | CNU051978 | Choshi, Chiba, Japan                                                 | HM629870  | HM629830 |
| <i>Gelidium jejuense</i> K.M.Kim, I.K.Hwang, H.S.Yoon & S.M.Boo  | CNU011862 | Jongdal, Jeju, Korea                                                 | JQ340445  | JQ340406 |
| <i>Gelidium johnstonii</i> Setchell & N.L.Gardner                | CNU002155 | Munseom, Jeju, Korea                                                 | KF384128  | KF381386 |
| <i>Gelidium kathyanniae</i> G.H.Boo & Hughey                     | UC2026076 | Dana Point, Orange County, California, USA; Dec 12, 2012             | MH780743  | MH780750 |
| <i>Gelidium latifolium</i> Bornet ex Hauck                       | -         | Plouguerneau, Brittany, France                                       | -         | U01818   |
| <i>Gelidium lineare</i> Iha & Freshwater                         | IBC0557   | Praia dos Castelhanos, Anchieta, Espirito Santo, Brazil; May 5, 2012 | KT208030  | KT208118 |
| <i>Gelidium linoides</i> Kützinger                               | -         | Shirahama, Shimoda, Shizuoka Pref., Japan                            | -         | AB030622 |
| <i>Gelidium longiramulosum</i> (Y.P.Lee & B.S.Kim) G.H.Boo       | A331      | Geomundo, Yeosu, Korea                                               | HM629882  | HM629842 |
| <i>Gelidium maggsiae</i> Rico & Guiry                            | -         | Concha de Artedo, Asturias, Spain                                    | -         | KC192648 |
| <i>Gelidium microdon</i> Kützinger                               | CNU025583 | Tarifa, Cadiz, Spain                                                 | KT920396  | KT920271 |
| <i>Gelidium microdenticum</i> W.R.Taylor                         | SP469069  | Encantadas, Ilha do Mel, PR, Brazil; Jul 12, 2014                    | KX574735  | KX555611 |
| <i>Gelidium microglossum</i> A.L.Grusz & Freshwater              | WNC20957  | Playa Brasilito, Guanacaste, Costa Rica; Oct 5, 2000                 | KC288160  | KC192649 |

|                                                                           |                       |                                                                    |          |          |
|---------------------------------------------------------------------------|-----------------------|--------------------------------------------------------------------|----------|----------|
| <i>Gelidium microphyllum</i> (Crosby-Smith) Kylin                         | MATS300               | Wharekauni, Chatham Island, New Zealand                            | KT920397 | -        |
| <i>Gelidium microphyllum</i>                                              | -                     | Ringaringa Beach, Stewart Island, New Zealand; Oct 9, 1998         | -        | AY648022 |
| <i>Gelidium micropterum</i> Kützing                                       | Nightingale 2010 023  | Seal Pool and nearby shore, Nightingale, Saint Helena; 21.iii.2010 | MK202369 | MK185763 |
| <i>Gelidium millarianum</i> G.H.Boo, Hughey, K.A.Miller & S.M.Boo         | CNU056286             | Gordon's Bay, Sydney, Australia; Jan 23, 2014                      | KX423467 | KX423484 |
| <i>Gelidium minimum</i> K.M.Kim, I.K.Hwang, H.S.Yoon & S.M.Boo            | CNU002165             | Beomsum, Jeju, Korea                                               | JQ340447 | -        |
| <i>Gelidium minimum</i>                                                   | CNU011894             | Beomsum, Jeju, Korea                                               | -        | JQ340411 |
| <i>Gelidium omanense</i> M.J.Wynne                                        | CNU000130             | Raaha Bay, Dhofar, Oman                                            | JX891569 | -        |
| <i>Gelidium omanense</i>                                                  | Wynne 1609-2000-09-36 | Hatom Cove, East of Mirbat, Dhofar, Oman                           | -        | AY346460 |
| <i>Gelidium pacificum</i> Okamura                                         | CNU051985             | Chiba University Marine Station, Japan                             | HM629871 | HM629831 |
| <i>Gelidium pakistanicum</i> (Afaq-Husain & Shameel) Shahnaz & Freshwater | WNC:22843             | Paradise Point, Karachi, Pakistan; Dec 20, 2014                    | MK497727 | MK497735 |
| <i>Gelidium palmatum</i> G.H.Boo & K.M.Kim                                | CNU059010             | Donggori, Wando, Korea; 14.vii. 2014                               | MN784142 | -        |
| <i>Gelidium palmatum</i>                                                  | CNU059012             | Donggori, Wando, Korea; 14.vii. 2014                               | -        | MN784150 |
| <i>Gelidium pluma</i> Bornet ex N.H.Loomis                                | ARS00824              | Hawaii, USA                                                        | HQ422688 | -        |
| <i>Gelidium pluma</i>                                                     | -                     | Hilo, Hawaii, USA                                                  | -        | AF522367 |
| <i>Gelidium pristoides</i> (Turner) Kützing                               | CNU053084             | Dalebrook, Flase Bay, Western Cape Prov., South Africa             | HM629874 | HM629834 |
| <i>Gelidium profundum</i> Tronchin & Freshwater                           | S04-129               | Protea Banks Reef, KwaZulu-Natal, South Africa                     | -        | EF190251 |
| <i>Gelidium prostratum</i> K.M.Kim, I.K.Hwang, H.S.Yoon & S.M.Boo         | CNU011878             | Euihang, Taeon, Korea                                              | JQ340456 | -        |
| <i>Gelidium prostratum</i>                                                | CNU010848             | Euihang, Taeon, Korea                                              | -        | JQ340415 |

|                                                                      |           |                                                                             |          |          |
|----------------------------------------------------------------------|-----------|-----------------------------------------------------------------------------|----------|----------|
| <i>Gelidium pteridifolium</i> R.E. Norris,<br>Hommersand & Fredericq | SA04-110  | Shelly Beach, KwaZulu-Natal, South Africa                                   | -        | EF190253 |
| <i>Gelidium pulchellum</i> (Turner) Kützing                          | G6278     | Ilfracombe Harbour, Ilfracombe, UK                                          | JX891570 | -        |
| <i>Gelidium pulchellum</i>                                           | -         | Graveyard Beach, Co. Galway, Ireland                                        | -        | U01969   |
| <i>Gelidium purpurascens</i> N.L.Gardner                             | CNU026162 | Agate Beach, California, USA                                                | HM629873 | HM629833 |
| <i>Gelidium pusillum</i> (Stackhouse) Le Jolis                       | CNU026677 | Les Algues, Lion sur-mer, Caen, France                                      | HM629872 | HM629832 |
| <i>Gelidium rex</i> Santelices & I.A.Abbott                          | CNU026315 | Punta Lengua de Vaca, Tongoy Bay, Coquimbo, Chile                           | HM629875 | HM629835 |
| <i>Gelidium robustum</i> (N.L.Gardner) Hollenberg<br>& I.A.Abbott    | CNU024833 | Natividad Island, Baja California Sur, Mexico                               | HM629876 | HM629836 |
| <i>Gelidium rosulatum</i> G.H.Boo, J.K.Park, K.S.Han<br>& H.S.Yoon   | SKK003974 | Gajebawi Rock, Ulleungdo, Korea; 13.v.2017                                  | OK665775 | OK665782 |
| <i>Gelidium sanyaense</i> G.C.wang & X.I.Wang                        | FCG2-1    | Guaishitan, Fangchenggang, Guangxi, China; Oct 18, 2016                     | KY494659 | KY494676 |
| <i>Gelidium sclerophyllum</i> W.R.Taylor                             | WNC20891  | Montezuma, Guanacaste, Costa Rica; 1.x.2000                                 | KC288159 | KC192651 |
| <i>Gelidium sclerophyllum</i>                                        | PHY4514   | Near Mono Feliz, Punta Burica, Chiriqui, Panama; 8.i.2011                   | KY656556 | -        |
| <i>Gelidium sclerophyllum</i>                                        | PHY4629   | Southwest side of Isla Burica, Punta Burica, Chiriqui,<br>Panama; 10.i.2011 | -        | KY573959 |
| <i>Gelidium sclerophyllum</i>                                        | PHY4645   | Southwest side of Isla Burica, Punta Burica, Chiriqui,<br>Panama; 10.i.2011 | KY656557 | KY573996 |
| <i>Gelidium sclerophyllum</i>                                        | CFES 079  | La Libertad, La Vega, El Salvador; 28.i.2009                                | MN336343 | -        |
| <i>Gelidium sclerophyllum</i>                                        | ARS02710  | Hawaii, USA                                                                 | HQ422595 | -        |
| <i>Gelidium sclerophyllum</i>                                        | ARS02711  | Hawaii, USA                                                                 | HQ422596 | -        |
| <i>Gelidium sentosaense</i> G.H.Boo, Y.Cai & S.M.Boo                 | CNU031026 | Sentosa Island, Singapore                                                   | KU512774 | KY494676 |

|                                                                                    |                  |                                                                                   |          |          |
|------------------------------------------------------------------------------------|------------------|-----------------------------------------------------------------------------------|----------|----------|
| <i>Gelidium serrulatum</i> J.Agardh                                                | -                | Mochimo, Sucre, Venezuela                                                         | -        | U01042   |
| <i>Gelidium spinosum</i> (S.G.Gmelin) P.C.Silva                                    | CNU025526        | Muros, A Coruña, Spain                                                            | HM629877 | HM629837 |
| <i>Gelidium tenuifolium</i> Shimada, Horiguchi & Masuda                            | -                | Shizuoka, Shimoda, Japan                                                          | -        | AB030624 |
| <i>Gelidium usmanghanii</i> Afaq-Husain & M.Shameel                                | #1109-2000-04-33 | Raaha (=Alto) Bay, east of Wadi Zeid and east of Mirbat, Dhofar, Oman; 11.ix.2000 | -        | AY346463 |
| <i>Gelidium vagum</i> Okamura                                                      | CNU049025        | Heuksando, Shinan, Korea                                                          | HM629879 | HM629840 |
| <i>Gelidium vittatum</i> (Linnaeus) Kützinger                                      | -                | Lüderitz, Namibia                                                                 | -        | AF501289 |
| <i>Gelidium yangmeikengense</i> G.C.Wang & X.L.Wang                                | SZ14-3           | Yangmeikeng, Shenzhen, Guangdong, China; 20.iv.2015                               | KY494661 | KY494680 |
| <i>Ptilophora spongiophila</i> G.H.Boo, L.Le Gall, I.K.Hwang, K.A.Miller & S.M.Boo | PC0171941        | Cap Sainte Marie, Madagascar; May 22, 2010                                        | MG066721 | MG066747 |

Dash (-) indicates not applicable.
